# Supplementary material for: ATG-18 and EPG-6 are Both Required for Autophagy but Differentially Contribute to Lifespan Control in Caenorhabditis elegans
Source: Cells. 2019 Mar 12;8(3):236. doi: 10.3390/cells8030236 (PMC6468378; doi:10.3390/cells8030236)
Supplement: Supplementary file 1 [file cells-08-00236-s001.zip › cells-448378-final-suppl/cells-448378-final-suppl-data.xlsx]

## Sheet: Data Figure 1
	Figure 1B
	N2 (Wild type)				atg-18(gk378)				epg-6(bp242)				atg-18(gk378);epg-6(bp242)
	Worm #	Eggs	Brood size		Worm #	Eggs	Brood size		Worm #	Eggs	Brood size		Worm #	Eggs	L4/adult
	#1	276	271		#1	268	226		#1	266	185		#1	120	10
	#2	351	329		#2	280	175		#2	236	155		#2	183	36
	#3	372	308		#3	179	142		#3	239	157		#3	169	42
	#4	221	200		#4	325	183		#4	230	150		#4	165	33
	#5	298	296		#5	242	179		#5	244	179		#5	211	45
	#6	283	278		#6	363	268		#6	252	177		#6	120	10
	Mean	300.167	280.333		#7	245	182		#7	202	97		#7	61	4
	STDEV	54.5799	44.5541		#8	273	166		#8	343	236		#8	101	30
					#9	319	184		#9	346	162		#9	85	21
					#10	235	134		#10	307	196		#10	302	14
					#11	166	131		#11	187	78		#11	292	25
					#12	289	176		#12	243	124		#12	328	27
					#13	323	199		#13	211	107		#13	196	7
					#14	264	158		#14	277	141		#14	165	6
					#15	249	140		#15	332	192		#15	245	24
					#16	203	139		#16	255	169		#16	278	20
					Mean	263.938	173.875		#17	253	172		#17	170	5
					P-value to wild type	0.176545	1.16035e-05		#18	295	206		#18	237	17
					STDEV	53.8312	36.1605		#19	291	171		#19	288	26
									#20	113	72		#20	232	9
	Summary:								#21	268	169		Mean	197.4	20.55
		Eggs	STDEV	P-value to wild type	P-value to atg-18	P-value to epg-6			#22	232	145		P-value to wild type	0.00589693	2.55188e-18
	N2	300.167	54.5799						#23	211	146		STDEV	77.2034	12.4962
	atg-18(gk378)	263.938	53.8312	0.176545					Mean	253.609	155.913		P-value to atg-18	0.00614217	9.30483e-19
	epg-6(bp242)	253.609	53.0015	0.0674035	0.555577				P-value to wild type	0.0674035	3.84749e-07		P-value to epg-6	0.00748947	8.65708e-18
	atg-18(gk378);epg-6(bp242)	197.4	77.2034	0.00589693	0.00614217	0.00748947			STDEV	53.0015	39.8815
									P-value to atg-18	0.555577	0.159335
	Figure 1C
	N2					epg-6					atg-18					atg-18;epg-6
	Worm	Eggs	Larvae	Survival until L4 (%)		Worm	Eggs	Larvae	Survival until L4 (%)		Worm	Eggs	Larvae	Survival until L4 (%)		Worm	Eggs	Larvae	Survival until L4 (%)
	1	192	251	100		1	182	205	100		1	228	38	16.6667		1	246	5	2.03252
	2	311	333	100		2	325	351	100		3	316	62	19.6203		2	368	28	7.6087
	3	338	351	100		3	244	232	95.082		4	271	63	23.2472		3	341	9	2.6393
	4	290	293	100		4	348	324	93.1034		5	292	70	23.9726		4	313	27	8.6262
	5	366	373	100		5	300	289	96.3333		Mean	276.75	58.25	20.8767		5	208	37	17.7885
	Mean	299.4	320.2	100		Mean	279.8	280.2	96.9037		STDEV	37.3397	13.9613	3.39151		Mean	295.2	21.2	7.73903
	STDEV	66.4891	48.551	0		STDEV	66.9866	61.2103	3.05205		P-value	0.541141	0.000112888	2.16736e-05		STDEV	66.5935	13.6088	6.3318
						P-value	0.654769	0.287024	0.0858746				***	***		P-value	0.922959	7.42126e-05	5.29084e-06
																		***	***

## Sheet: Data Figure 2
	Figure 2C-D
	N2 (wild type)						atg-18(gk378)						epg-6(bp242)
		Slice	Count	AVG size (inch2)	Size (μm2)			Slice	Count	AVG size (inch2)	Size (μm2)			Slice	Count	AVG size (inch2)	Size (μm2)
	Early embryo (atg-18 set)	N2_Set2_0h_03_c2-1.TIF	140	0.005	0.463383		Early embryo	atg18_Set2_0h_01_c2-1.TIF	33	0.003	0.27803		Early embryo	epg6_Set1_0h_11_GFP-1.TIF	57	0.004	0.370706
		N2_Set2_0h_04_c2-1.TIF	84	0.005	0.463383			atg18_Set2_0h_02_c2-1.TIF	40	0.003	0.27803			epg6_Set1_0h_13_GFP-1.TIF	37	0.003	0.27803
		N2_Set2_0h_05_c2-1.TIF	114	0.006	0.556059			atg18_Set2_0h_03_c2-1.TIF	51	0.003	0.27803			epg6_Set1_0h_15_GFP-1.TIF	59	0.003	0.27803
		N2_Set2_0h_06_c2-1.TIF	105	0.004	0.370706			atg18_Set2_0h_04_c2-1.TIF	52	0.003	0.27803			epg6_Set1_4h_01_GFP-1.TIF	60	0.003	0.27803
		N2_Set2_0h_07_c2-1.TIF	85	0.004	0.370706			atg18_Set2_0h_07_c2-1.TIF	59	0.004	0.370706			epg6_Set2_0h_01_GFP-1.TIF	37	0.004	0.370706
		N2_Set2_0h_08_c2-1.TIF	89	0.006	0.556059			atg18_Set2_0h_08_c2-1.TIF	44	0.003	0.27803			epg6_Set2_4h_02_GFP-1.TIF	40	0.003	0.27803
		N2_Set2_0h_11_c2-1.TIF	139	0.006	0.556059			atg18_Set2_0h_10_c2-1.TIF	73	0.003	0.27803			epg6_Set2_4h_03_GFP-1.TIF	68	0.005	0.463383
		N2_Set2_0h_13_c2-1.TIF	154	0.005	0.463383			atg18_Set2_0h_12_c2-1.TIF	62	0.003	0.27803			epg6_Set2_4h_07_GFP-1.TIF	77	0.003	0.27803
		N2_Set2_0h_14_c2-1.TIF	157	0.004	0.370706			atg18_Set2_0h_13_c2-1.TIF	37	0.003	0.27803			epg-6_Set4_0h_Early_08_c2-1.TIF	52	0.003	0.27803
		N2_Set2_0h_15_c2-1.TIF	127	0.005	0.463383			atg18_Set2_0h_14_c2-1.TIF	33	0.004	0.370706			epg-6_Set4_4h_Early_13_c2-1.TIF	47	0.003	0.27803
		N2_Set3_0h_Early_01_c2-1.TIF	106	0.004	0.370706			atg18_Set2_0h_15_c2-1.TIF	50	0.003	0.27803			epg-6_Set4_4h_Early_16_c2-1.TIF	52	0.003	0.27803
		N2_Set3_0h_Early_03_c2-1.TIF	99	0.006	0.556059			atg18_Set3_0h_Early_02_c2-1.TIF	38	0.003	0.27803			epg-6_Set4_4h_Early_19_c2-1.TIF	51	0.003	0.27803
		N2_Set3_0h_Early_07_c2-1.TIF	92	0.004	0.370706			atg18_Set3_0h_Early_04_c2-1.TIF	58	0.003	0.27803			Mean	53.0833		0.308922
		N2_Set3_0h_Early_10_c2-1.TIF	81	0.004	0.370706			atg18_Set3_0h_Early_08_c2-1.TIF	34	0.003	0.27803			STDEV	12.154		0.0603638
		N2_Set4_0h_Early_03_c2-1.TIF	97	0.006	0.556059			atg18_Set3_4h_Early_05_c2-1.TIF	56	0.003	0.27803			P-value vs N2	2.72521e-10		8.2186e-06
		N2_Set4_0h_Early_07_c2-1.TIF	117	0.004	0.370706			atg18_Set3_4h_Early_07_c2-1.TIF	42	0.003	0.27803
		N2_Set4_0h_Early_10_c2-1.TIF	67	0.003	0.27803			atg18_Set3_4h_Early_09_c2-1.TIF	43	0.003	0.27803
	Early embryo (epg-6 set)	N2_Set1_0h_15_GFP-1.TIF	87	0.006	0.556059			atg18_Set3_4h_Early_11_c2-1.TIF	56	0.004	0.370706
		N2_Set2_0h_06_GFP-1.TIF	149	0.005	0.463383			atg18_Set3_4h_Early_13_c2-1.TIF	48	0.003	0.27803
		N2_Set3_0h_01_GFP-1.TIF	137	0.005	0.463383			atg18_Set4_0h_Early_06_c2-1.TIF	27	0.002	0.185353
		N2_Set3_0h_14_GFP-1.TIF	116	0.005	0.463383			atg18_Set4_0h_Early_10_c2-1.TIF	54	0.002	0.185353
		N2_Set4_0h_Early_03_c2-1.TIF	108	0.004	0.370706			Mean	47.1429		0.282443
		N2_Set4_0h_Early_04_c2-1.TIF	109	0.004	0.370706			STDEV	11.5511		0.0461171
		N2_Set4_0h_Early_07_c2-1.TIF	69	0.004	0.370706			P-value vs N2	5.16789e-12		1.44401e-09
		Mean	109.5		0.440214
		STDEV	26.2281		0.0831174
	N2 (wild type)						atg-18(gk378)						epg-6(bp242)
		Slice	Count	AVG size (inch2)	Size (μm2)			Slice	Count	AVG size (inch2)	Size (μm2)			Slice	Count	AVG size (inch2)	Size (μm2)
	Late embryo	N2_Set2_4h_03_c2-1.TIF	9	0.003	0.27803		Late embryo	atg18_Set2_4h_10_c2-1.TIF	46	0.003	0.27803		Late embryo	epg6_Set1_0h_05_GFP-1.TIF	72	0.005	0.463383
		N2_Set2_4h_07_c2-1.TIF	7	0.002	0.185353			atg18_Set2_4h_15_c2-1.TIF	29	0.003	0.27803			epg6_Set1_4h_02_GFP-1.TIF	41	0.004	0.370706
		N2_Set2_4h_08_c2-1.TIF	7	0.003	0.27803			atg18_Set3_0h_Late_01_c2-1.TIF	48	0.003	0.27803			epg6_Set1_4h_12_GFP-1.TIF	93	0.005	0.463383
		N2_Set2_4h_13_c2-1.TIF	5	0.002	0.185353			atg18_Set3_0h_Late_05_c2-1.TIF	83	0.005	0.463383			epg6_Set2_0h_04_GFP-1.TIF	41	0.005	0.463383
		N2_Set3_0h_Late_09_c2-1.TIF	4	0.002	0.185353			atg18_Set3_0h_Late_13_c2-1.TIF	72	0.005	0.463383			epg6_Set2_0h_12_GFP-1.TIF	57	0.004	0.370706
		N2_Set3_0h_Late_14_c2-1.TIF	2	0.001	0.0926765			atg18_Set1_0h_Late_01_c2-1.TIF	52	0.004	0.370706			epg6_Set2_0h_14_GFP-1.TIF	25	0.004	0.370706
		N2_Set3_0h_Late_15_c2-1.TIF	2	0.001	0.0926765			atg18_Set1_0h_09_c2-1.TIF	52	0.003	0.27803			epg6_Set2_4h_14_GFP-1.TIF	32	0.004	0.370706
		N2_Set3_4h_Late_01_c2-1.TIF	3	0.002	0.185353			Mean	54.5714		0.344227			epg6_Set3_0h_02_GFP-1.TIF	105	0.005	0.463383
		N2_Set3_4h_Late_03_c2-1.TIF	2	0.001	0.0926765			STDEV	17.775		0.088153			epg6_Set3_0h_04_GFP-1.TIF	77	0.005	0.463383
		N2_Set3_4h_Late_05_c2-1.TIF	2	0.002	0.185353			P-value vs N2	0.000250676		0.00135772			epg6_Set3_0h_05_GFP-1.TIF	70	0.004	0.370706
		N2_Set3_4h_Late_06_c2-1.TIF	1	0.001	0.0926765									epg6_Set3_0h_06_GFP-1.TIF	47	0.003	0.27803
		N2_Set3_4h_Late_08_c2-1.TIF	2	0.001	0.0926765									epg6_Set3_0h_07_GFP-1.TIF	58	0.005	0.463383
		N2_Set3_4h_Late_13_c2-1.TIF	2	0.001	0.0926765									epg6_Set3_0h_12_GFP-1.TIF	52	0.004	0.370706
		N2_Set3_4h_Late_14_c2-1.TIF	5	0.001	0.0926765									epg6_Set3_0h_15_GFP-1.TIF	44	0.003	0.27803
		N2_Set4_0h_Late_01_c2-1.TIF	2	0.004	0.370706									Mean	58.1429		0.397185
		N2_Set4_4h_Late_04_c2-1.TIF	0	NaN										STDEV	22.9241		0.0673085
		N2_Set4_4h_Late_05_c2-1.TIF	8	0.002	0.185353									P-value vs N2	6.3559e-07		1.6165e-10
		N2_Set4_4h_Late_09_c2-1.TIF	0	NaN
		N2_Set1_0h_01_c2-1.TIF	39	0.003	0.27803
		N2_Set2_4h_12_GFP-1.TIF	3	0.002	0.185353
		N2_Set4_0h_Late_05_c2-1.TIF	0	NaN
		N2_Set4_0h_Late_11_c2-1.TIF	1	0.001	0.0926765
		N2_Set4_4h_Late_07_c2-1.TIF	2	0.002	0.185353
		N2_Set4_4h_Late_15_c2-1.TIF	9	0.004	0.370706
		N2_Set4_4h_Late_08_c2-1.TIF	4	0.001	0.0926765
		N2_Set3_0h_02_GFP-1.TIF	3	0.001	0.0926765
		N2_Set1_0h_11_GFP-1.TIF	5	0.002	0.185353
		N2_Set1_0h_12_GFP-1.TIF	27	0.003	0.27803
		N2_Set1_4h_01_GFP-1.TIF	1	0.002	0.185353
		N2_Set1_4h_03_GFP-1.TIF	2	0.001	0.0926765
		N2_Set1_4h_11_GFP-1.TIF	9	0.002	0.185353
		Mean	5.41935		0.175423
		STDEV	7.99489		0.0849368
		Settings for the ImageJ stress granule counter plugin:			Parameters for the calculations for size in μm2 from inch2
		Embryo				AVG size in inch2/size of 1 pixel in inch2*size of 1 pixel in μm2			Surface area of 1 Pixel
		Number of smoothes	70		Size of 1 pixel in inch2	0.0067*0.0067		=	4.489e-05
		Number of smoothes after subtraction	4		Size of 1 pixel in μm2	0.0645*0.0645		=	0.00416025
		Threshold	3000
		Minimum particle size, pixels	25		Formula to calculate size in µm2:		(AVG size in inch2)/(size of 1 pixel in inch2)*(size of 1 pixel in μm2)
		Maximum particle size, pixels	10000
		Minimum particle circularity	0.2

## Sheet: Data Figure 3
		Figure 3C-D
		N2 (wild type)								atg-18(gk378)								epg-6(bp242)
			Slice	Count	AVG size (inch2)	Size (μm2)	Number of cells	Count/cell			Slice	Count	AVG size (inch2)	Size (μm2)	Number of cells	Count/cell			Slice	Count	AVG size (inch2)	Size (μm2)	Number of cells	Count/cell
		Seam cells (atg-18 set)	N2_Set2_6h_03a_c2-1.TIF	23	0.006	1.40153	4	5.75		Seam cells	atg18_Set2_6h_04a_c2-1.TIF	6	0.006	1.40153	4	1.5		Seam cells	epg6_Set2_6h_03_GFP-1.TIF	2	0.008	1.8687	3	0.666667
			N2_Set2_6h_04_c2-1.TIF	9	0.004	0.934352	4	2.25			atg18_Set2_6h_05a_c2-1.TIF	3	0.007	1.63512	2	1.5			epg6_Set3_6h_04_GFP-1.TIF	3	0.008	1.8687	3	1
			N2_Set2_6h_10_c2-1.TIF	4	0.003	0.700764	3	1.33333			atg18_Set2_6h_07a_c2-1.TIF	5	0.007	1.63512	4	1.25			epg6_Set3_6h_09_GFP-1.TIF	2	0.008	1.8687	2	1
			N2_Set2_6h_13a_c2-1.TIF	12	0.003	0.700764	3	4			atg18_Set2_6h_10a_c2-1.TIF	7	0.007	1.63512	4	1.75			epg6_Set3_6h_13_GFP-1.TIF	2	0.004	0.934352	2	1
			N2_Set4_6h_L1_01a_c2-1.TIF	15	0.003	0.700764	5	3			atg18_Set2_6h_02_c2-1.TIF	13	0.006	1.40153	8	1.625			epg-6_Set4_6h_L1_01a_c2-1.TIF	4	0.006	1.40153	2	2
			N2_Set4_6h_L1_05a_c2-1.TIF	7	0.005	1.16794	3	2.33333			atg18_Set3_6h_L1_10a_c2-1.TIF	5	0.006	1.40153	4	1.25			epg-6_Set4_6h_L1_03a_c2-1.TIF	9	0.008	1.8687	5	1.8
		Seam cells (epg-6 set)	N2_Set1_6h_15_GFP-1.TIF	27	0.004	0.934352	5	5.4			atg18_Set3_6h_L1_01a_c2-1.TIF	4	0.008	1.8687	4	1			epg-6_Set4_6h_L1_08a_c2-1.TIF	4	0.003	0.700764	2	2
			N2_Set2_6h_03_GFP-1.TIF	9	0.004	0.934352	4	2.25			atg18_Set3_6h_L1_06a_c2-1.TIF	8	0.007	1.63512	6	1.33333			epg-6_Set4_6h_L1_10a_c2-1.TIF	2	0.006	1.40153	2	1
			N2_Set2_6h_14_GFP-1.TIF	7	0.003	0.700764	2	3.5			atg18_Set4_6h_L1_01a_c2-1.TIF	6	0.007	1.63512	4	1.5			epg-6_Set4_6h_L1_05a_c2-1.TIF	5	0.003	0.700764	5	1
			N2_Set2_6h_15_GFP-1.TIF	32	0.004	0.934352	13	2.46154			atg18_Set4_6h_L2-3_03a_c2-1.TIF	10	0.006	1.40153	5	2			Mean			1.40153		1.27407
			N2_Set3_6h_08_GFP-1.TIF	35	0.003	0.700764	6	5.83333			atg18_Set4_28h_L1_07a_c2-1.TIF	3	0.006	1.40153	3	1			STDEV			0.509093		0.509296
			N2_Set3_6h_14_GFP-1.TIF	15	0.004	0.934352	5	3			Mean			1.55017		1.42803			P-value vs N2			0.0159389		0.00014921
			N2_Set4_6h_L1_08a_c2-1.TIF	33	0.003	0.700764	6	5.5			STDEV			0.157485		0.303962
			Mean			0.880447		3.5855			P-value vs N2			1.52274e-08		0.000289344
			STDEV			0.216491		1.55539
		N2 (wild type)								atg-18(gk378)								epg-6(bp242)
			Slice	Count	AVG size (inch2)	Size (μm2)					Slice	Count	AVG size (inch2)	Size (μm2)					Slice	Count	AVG size (inch2)	Size (μm2)
		Head (atg-18 set)	N2_Set3_6h_L1_02c_c2-1.TIF	16	0.002	0.467176				Head	atg18_Set3_6h_L1_01c_c2-1.TIF	77	0.004	0.934352				Head	epg-6_Set4_6h_L1_04c_c2-1.TIF	62	0.004	0.934352
			N2_Set3_6h_L1_03c_c2-1.TIF	22	0.002	0.467176					atg18_Set3_6h_L1_02b_c2-1.TIF	60	0.003	0.700764					epg-6_Set4_6h_L1_05b-c_c2-1.TIF	53	0.004	0.934352
			N2_Set3_6h_L1_05c_c2-1.TIF	25	0.002	0.467176					atg18_Set3_6h_L1_03c_c2-1.TIF	42	0.004	0.934352					epg-6_Set4_6h_L1_06c_c2-1.TIF	58	0.004	0.934352
			N2_Set3_6h_L1_06c_c2-1.TIF	29	0.002	0.467176					atg18_Set3_6h_L1_04c_c2-1.TIF	62	0.004	0.934352					epg-6_Set4_6h_L1_07b-c_c2-1.TIF	44	0.003	0.700764
			N2_Set3_6h_L1_09c_c2-1.TIF	11	0.003	0.700764					atg18_Set3_6h_L1_05c_c2-1.TIF	56	0.003	0.700764					epg-6_Set4_6h_L1_08b-c_c2-1.TIF	73	0.004	0.934352
			N2_Set3_6h_L1_10c_c2-1.TIF	16	0.002	0.467176					atg18_Set3_6h_L1_06c_c2-1.TIF	77	0.003	0.700764					epg-6_Set4_6h_L1_09c_c2-1.TIF	60	0.004	0.934352
			N2_Set4_6h_L1_01c_c2-1.TIF	40	0.002	0.467176					atg18_Set3_6h_L1_07c_c2-1.TIF	75	0.004	0.934352					Mean	58.3333		0.89542
			N2_Set4_6h_L1_02c_c2-1.TIF	24	0.002	0.467176					atg18_Set3_6h_L1_09c_c2-1.TIF	52	0.003	0.700764					STDEV	9.64711		0.0953619
			N2_Set4_6h_L1_03c_c2-1.TIF	19	0.002	0.467176					atg18_Set3_6h_L1_10c_c2-1.TIF	74	0.004	0.934352					P-value vs N2	2.35143e-05		3.62214e-05
			N2_Set4_6h_L1_04c_c2-1.TIF	50	0.002	0.467176					atg18_Set3_28h_L1_02b_c2-1.TIF	73	0.004	0.934352
			N2_Set4_6h_L1_05c_c2-1.TIF	47	0.002	0.467176					atg18_Set3_28h_L1_05c_c2-1.TIF	74	0.003	0.700764
			N2_Set4_6h_L1_06c_c2-1.TIF	14	0.002	0.467176					atg18_Set3_28h_L1_09c_c2-1.TIF	65	0.003	0.700764
			N2_Set4_6h_L1_07b_c2-1.TIF	14	0.002	0.467176					atg18_Set3_56h_L1_06c_c2-1.TIF	61	0.003	0.700764
			N2_Set4_6h_L1_09c_c2-1.TIF	13	0.002	0.467176					atg18_Set3_56h_L1_09c_c2-1.TIF	62	0.003	0.700764
			N2_Set4_6h_L1_08c_c2-1.TIF	14	0.002	0.467176					atg18_Set4_6h_L1_01c_c2-1.TIF	62	0.004	0.934352
		Head (epg-6 set)	N2_Set4_6h_L1_01c_c2-1.TIF	20	0.002	0.467176					atg18_Set4_6h_L1_04c_c2-1.TIF	52	0.003	0.700764
			N2_Set4_6h_L1_02c_c2-1.TIF	14	0.002	0.467176					atg18_Set4_6h_L2-3_03c_c2-1.TIF	89	0.003	0.700764
			N2_Set4_6h_L1_03c_c2-1.TIF	0	NaN						atg18_Set4_28h_L1_01a_c2-1.TIF	62	0.004	0.934352
			N2_Set4_6h_L1_03c_c2-1.TIF	25	0.002	0.467176					atg18_Set4_28h_L1_02c_c2-1.TIF	57	0.004	0.934352
			N2_Set4_6h_L1_04c_c2-1.TIF	22	0.002	0.467176					atg18_Set4_28h_L1_03b_c2-1.TIF	56	0.003	0.700764
			N2_Set4_6h_L1_05c_c2-1.TIF	19	0.002	0.467176					atg18_Set4_28h_L1_04c_c2-1.TIF	58	0.003	0.700764
			N2_Set4_6h_L1_07c_c2-1.TIF	17	0.002	0.467176					atg18_Set4_28h_L1_07b_c2-1.TIF	41	0.003	0.700764
			N2_Set4_6h_L1_08b-c_c2-1.TIF	41	0.002	0.467176					atg18_Set4_28h_L1_10b_c2-1.TIF	70	0.004	0.934352
			N2_Set4_6h_L1_09c_c2-1.TIF	10	0.003	0.700764					Mean	63.3478		0.802324
			N2_Set4_6h_L1_10c_c2-1.TIF	29	0.003	0.700764					STDEV	11.5743		0.118399
			Mean	22.04		0.496374					P-value vs N2	5.81284e-16		1.16115e-12
			STDEV	11.9355		0.0789135
			Settings for the ImageJ stress granule counter plugin:			Parameters for the calculations for size in μm2 from inch2
			seam cells				AVG size in inch2/size of 1 pixel in inch2*size of 1 pixel in μm2			Surface area of 1 Pixel
			Number of smoothes	70		Size of 1 pixel in inch2	0.0067*0.0067		=	4.489e-05
			Number of smoothes after subtraction	4		Size of 1 pixel in μm2	0.1024*0.1024		=	0.0104858
			Threshold	3000
			Minimum particle size, pixels	25		Formula to calculate size in µm2:		(AVG size in inch2)/(size of 1 pixel in inch2)*(size of 1 pixel in μm2)
			Maximum particle size, pixels	10000
			Minimum particle circularity	0.2
			head
			Number of smoothes	70
			Number of smoothes after subtraction	4
			Threshold	3000
			Minimum particle size, pixels	25
			Maximum particle size, pixels	10000
			Minimum particle circularity	0.6

## Sheet: Data Figure 4
	Figure 4C-D
	N2 (wild type)								atg-18(gk378)								epg-6(bp242)
		Slice	Count	AVG size (inch2)	Size (μm2)	Number of cells	Count/cell			Slice	Count	AVG size (inch2)	Size (μm2)	Number of cells	Count/cell			Slice	Count	AVG size (inch2)	Size (μm2)	Number of cells	Count/cell
	Seam cells (atg18)	N2_Set2_28h_L2-3_02a_c2-1.TIF	11	0.003	0.700764	6	1.83333		Seam cells	atg18_Set2_28h_L2-3_02a_c2-1.TIF	3	0.008	1.8687	3	1		Seam cells	epg6_Set1_52h_07_GFP-1.TIF	4	0.002	0.467176	7	0.571429
		N2_Set2_28h_L2-3_04a_c2-1.TIF	30	0.003	0.700764	8	3.75			atg18_Set2_52h_L2-3_04a_c2-1.TIF	2	0.008	1.8687	2	1			epg6_Set1_52h_13_GFP-1.TIF	8	0.003	0.700764	6	1.33333
		N2_Set2_28h_L2-3_05a_c2-1.TIF	31	0.002	0.467176	4	7.75			atg18_Set2_52h_L2-3_05a_c2-1.TIF	3	0.003	0.700764	2	1.5			epg6_Set1_52h_15_GFP-1.TIF	2	0.002	0.467176	2	1
		N2_Set2_28h_L2-3_07a_c2-1.TIF	14	0.002	0.467176	4	3.5			atg18_Set2_52h_L2-3_06a_c2-1.TIF	6	0.006	1.40153	4	1.5			epg6_Set2_52h_07_GFP-1.TIF	9	0.002	0.467176	6	1.5
		N2_Set2_28h_L2-3_10a_c2-1.TIF	23	0.003	0.700764	8	2.875			atg18_Set2_52h_L2-3_07a_c2-1.TIF	7	0.005	1.16794	4	1.75			epg6_Set2_52h_11_GFP-1.TIF	5	0.004	0.934352	5	1
		N2_Set3_28h_L2-3_02a_c2-1.TIF	41	0.003	0.700764	7	5.85714			atg18_Set2_52h_L2-3_08a_c2-1.TIF	10	0.002	0.467176	8	1.25			epg6_Set3_52h_08_GFP-1.TIF	8	0.002	0.467176	6	1.33333
		N2_Set3_28h_L2-3_07a_c2-1.TIF	20	0.003	0.700764	4	5			atg18_Set3_28h_L2-3_06a_c2-1.TIF	11	0.006	1.40153	8	1.375			epg-6_Set4_52h_L2-3_01a_c2-1.TIF	3	0.005	1.16794	3	1
		N2_Set3_28h_L2-3_09a_c2-1.TIF	11	0.003	0.700764	7	1.57143			atg18_Set3_28h_L2-3_10a_c2-1.TIF	10	0.006	1.40153	7	1.42857			epg-6_Set4_52h_L2-3_05a_c2-1.TIF	4	0.003	0.700764	3	1.33333
		N2_Set4_28h_L2-3_01a_c2-1.TIF	40	0.003	0.700764	10	4			atg18_Set3_56h_L2-3_08a_c2-1.TIF	5	0.005	1.16794	6	0.833333			epg-6_Set4_52h_L2-3_07a_c2-1.TIF	22	0.002	0.467176	9	2.44444
		N2_Set4_28h_L2-3_03a_c2-1.TIF	23	0.002	0.467176	8	2.875			atg18_Set3_56h_L2-3_10a_c2-1.TIF	1	0.006	1.40153	3	0.333333			epg-6_Set4_52h_L2-3_08a_c2-1.TIF	4	0.006	1.40153	3	1.33333
		N2_Set4_28h_L2-3_07a_c2-1.TIF	21	0.002	0.467176	5	4.2			atg18_Set4_52h_L2-3_01a_c2-1.TIF	10	0.006	1.40153	4	2.5			Mean			0.724122		1.28492
		N2_Set4_28h_L2-3_08a_c2-1.TIF	28	0.002	0.467176	8	3.5			atg18_Set4_52h_L2-3_10a_c2-1.TIF	6	0.002	0.467176	5	1.2			STDEV			0.338501		0.489074
	Seam cells (epg6)	N2_Set1_28h_11_GFP-1.TIF	33	0.002	0.467176	6	5.5			Mean			1.22634		1.30585			p-value vs N2			0.2324		3.26646e-07
		N2_Set1_28h_15_GFP-1.TIF	30	0.003	0.700764	8	3.75			STDEV			0.468501		0.52992
		N2_Set2_28h_05_GFP-1.TIF	21	0.002	0.467176	4	5.25			p-value vs N2			0.000567843		3.49814e-07
		N2_Set2_28h_08_GFP-1.TIF	11	0.002	0.467176	3	3.66667
		N2_Set2_28h_12_GFP-1.TIF	17	0.002	0.467176	2	8.5
		N2_Set3_28h_06_GFP-1.TIF	22	0.003	0.700764	4	5.5
		N2_Set3_28h_11_GFP-1.TIF	13	0.002	0.467176	6	2.16667
		N2_Set4_28h_L2-3_03a_c2-1.TIF	18	0.003	0.700764	4	4.5
		Mean			0.58397		4.27726
		STDEV			0.119828		1.78882
	N2 (wild type)								atg-18(gk378)								epg-6(bp242)
		Slice	Count	AVG size (inch2)	Size (μm2)					Slice	Count	AVG size (inch2)	Size (μm2)					Slice	Count	AVG size (inch2)	Size (μm2)
	Head (atg18)	N2_Set2_28h_L2-3_01c_c2-1.TIF	7	0.002	0.467176				Head	atg18_Set2_28h_L2-3_07c_c2-1.TIF	44	0.003	0.700764				Head	epg-6_Set4_28h_L2-3_02c_c2-1.TIF	52	0.003	0.700764
		N2_Set2_28h_L2-3_02c_c2-1.TIF	60	0.002	0.467176					atg18_Set2_52h_L2-3_01c_c2-1.TIF	59	0.004	0.934352					epg-6_Set4_28h_L2-3_01c_c2-1.TIF	58	0.003	0.700764
		N2_Set2_28h_L2-3_05c_c2-1.TIF	19	0.002	0.467176					atg18_Set2_52h_L2-3_04c_c2-1.TIF	52	0.004	0.934352					epg-6_Set4_28h_L2-3_04c_c2-1.TIF	55	0.003	0.700764
		N2_Set2_28h_L2-3_06c_c2-1.TIF	18	0.002	0.467176					atg18_Set2_52h_L2-3_05b_c2-1.TIF	61	0.004	0.934352					epg-6_Set4_28h_L2-3_08c_c2-1.TIF	62	0.003	0.700764
		N2_Set2_28h_L2-3_07c_c2-1.TIF	18	0.002	0.467176					atg18_Set2_52h_L2-3_06c_c2-1.TIF	47	0.003	0.700764					epg-6_Set4_52h_L2-3_01c_c2-1.TIF	53	0.003	0.700764
		N2_Set2_28h_L2-3_08c_c2-1.TIF	32	0.002	0.467176					atg18_Set2_52h_L2-3_09c_c2-1.TIF	54	0.004	0.934352					epg-6_Set4_52h_L2-3_03c_c2-1.TIF	32	0.003	0.700764
		N2_Set2_28h_L2-3_09c_c2-1.TIF	29	0.002	0.467176					atg18_Set2_52h_L2-3_10c_c2-1.TIF	57	0.004	0.934352					epg-6_Set4_52h_L2-3_05c_c2-1.TIF	72	0.002	0.467176
		N2_Set2_28h_L2-3_10c_c2-1.TIF	38	0.002	0.467176					atg18_Set3_28h_L2-3_01c_c2-1.TIF	71	0.004	0.934352					epg-6_Set4_52h_L2-3_07c_c2-1.TIF	67	0.003	0.700764
		N2_Set3_28h_L2-3_01c_c2-1.TIF	22	0.002	0.467176					atg18_Set3_28h_L2-3_06c_c2-1.TIF	58	0.004	0.934352					epg-6_Set4_52h_L2-3_08c_c2-1.TIF	59	0.003	0.700764
		N2_Set3_28h_L2-3_02c_c2-1.TIF	24	0.002	0.467176					atg18_Set3_28h_L2-3_08c_c2-1.TIF	47	0.004	0.934352					epg-6_Set4_52h_L2-3_10c_c2-1.TIF	36	0.003	0.700764
		N2_Set3_28h_L2-3_03c_c2-1.TIF	10	0.002	0.467176					atg18_Set3_28h_L2-3_10c_c2-1.TIF	50	0.003	0.700764					Mean	54.6		0.677405
		N2_Set3_28h_L2-3_07c_c2-1.TIF	18	0.002	0.467176					atg18_Set3_56h_L2-3_01c_c2-1.TIF	65	0.003	0.700764					STDEV	12.5096		0.073867
		N2_Set3_28h_L2-3_09c_c2-1.TIF	9	0.001	0.233588					atg18_Set3_56h_L2-3_02c_c2-1.TIF	48	0.004	0.934352					p-value vs N2	5.65461e-05		5.36726e-07
		N2_Set3_28h_L2-3_10c_c2-1.TIF	17	0.001	0.233588					atg18_Set3_56h_L2-3_05c_c2-1.TIF	62	0.004	0.934352
		N2_Set4_28h_L2-3_01c_c2-1.TIF	19	0.002	0.467176					atg18_Set3_56h_L2-3_07c_c2-1.TIF	51	0.003	0.700764
		N2_Set4_28h_L2-3_05c_c2-1.TIF	32	0.002	0.467176					atg18_Set3_56h_L2-3_08c_c2-1.TIF	53	0.003	0.700764
		N2_Set4_28h_L2-3_06c_c2-1.TIF	9	0.002	0.467176					atg18_Set4_52h_L2-3_01c_c2-1.TIF	50	0.003	0.700764
		N2_Set4_28h_L2-3_07c_c2-1.TIF	31	0.003	0.700764					atg18_Set4_52h_L2-3_02c_c2-1.TIF	38	0.003	0.700764
		N2_Set4_28h_L2-3_08c_c2-1.TIF	59	0.002	0.467176					atg18_Set4_52h_L2-3_03c_c2-1.TIF	53	0.003	0.700764
		N2_Set4_28h_L2-3_09c_c2-1.TIF	13	0.002	0.467176					atg18_Set4_52h_L2-3_04c_c2-1.TIF	53	0.003	0.700764
		N2_Set4_28h_L2-3_10c_c2-1.TIF	6	0.002	0.467176					atg18_Set4_52h_L2-3_07c_c2-1.TIF	51	0.004	0.934352
	Head (epg6)	N2_Set4_28h_L2-3_01c_c2-1.TIF	22	0.002	0.467176					atg18_Set4_52h_L2-3_08c_c2-1.TIF	46	0.004	0.934352
		N2_Set4_28h_L2-3_03c_c2-1.TIF	4	0.002	0.467176					atg18_Set4_52h_L2-3_09c_c2-1.TIF	45	0.003	0.700764
		N2_Set4_28h_L2-3_04c_c2-1.TIF	35	0.002	0.467176				Mean		52.8261		0.822636
		N2_Set4_28h_L2-3_06c_c2-1.TIF	86	0.002	0.467176				STDEV		7.48728		0.119306
		N2_Set4_28h_L2-3_07c_c2-1.TIF	55	0.002	0.467176				p-value vs N2		5.11587e-07		8.77146e-15
		N2_Set4_28h_L2-3_08c_c2-1.TIF	38	0.002	0.467176
		N2_Set4_28h_L2-3_09c_c2-1.TIF	65	0.002	0.467176
		N2_Set4_28h_L2-3_10c_c2-1.TIF	30	0.002	0.467176
		Mean	28.4483		0.459121
		STDEV	19.9814		0.0760189
		Settings for the ImageJ stress granule counter plugin:			Parameters for the calculations for size in μm2 from inch2
		seam cells				AVG size in inch2/size of 1 pixel in inch2*size of 1 pixel in μm2			Surface area of 1 Pixel
		Number of smoothes	70		Size of 1 pixel in inch2	0.0067*0.0067		=	4.489e-05
		Number of smoothes after subtraction	4		Size of 1 pixel in μm2	0.1024*0.1024		=	0.0104858
		Threshold	3000
		Minimum particle size, pixels	25		Formula to calculate size in µm2:		(AVG size in inch2)/(size of 1 pixel in inch2)*(size of 1 pixel in μm2)
		Maximum particle size, pixels	10000
		Minimum particle circularity	0.2
		head
		Number of smoothes	70
		Number of smoothes after subtraction	4
		Threshold	3000
		Minimum particle size, pixels	25
		Maximum particle size, pixels	10000
		Minimum particle circularity	0.6

## Sheet: Data Figure 5
	Figure 5C-D
	N2 (wild type)								atg-18(gk378)								epg-6(bp242)
		Slice	Count	AVG size (inch2)	Size (μm2)	Number of cells	Count/cell			Slice	Count	AVG size (inch2)	Size (μm2)	Number of cells	Count/cell			Slice	Count	AVG size (inch2)	Size (μm2)	Number of cells	Count/cell
	Seam cells (atg)	N2_Set2_52h_L4_01a_c2-1.TIF	39	0.003	0.700764	2	19.5		Seam cells	atg18_Set2_76h_L4_01a_c2-1.TIF	21	0.003	0.700764	2	10.5		Seam cells	epg6_Set1_52h_12_GFP-1.TIF	8	0.003	0.700764	3	2.66667
		N2_Set2_52h_L4_03a_c2-1.TIF	36	0.002	0.467176	2	18			atg18_Set2_76h_L4_02a_c2-1.TIF	21	0.003	0.700764	2	10.5			epg6_Set3_76h_08_GFP-1.TIF	9	0.004	0.934352	1	9
		N2_Set2_52h_L4_06a_c2-1.TIF	52	0.004	0.934352	2	26			atg18_Set2_76h_L4_03a_c2-1.TIF	30	0.004	0.934352	2	15			epg6_Set3_76h_10_GFP-1.TIF	9	0.003	0.700764	2	4.5
		N2_Set3_56h_L4_01a_c2-1.TIF	86	0.004	0.934352	3	28.6667			atg18_Set2_76h_L4_10a_c2-1.TIF	31	0.003	0.700764	2	15.5			epg6_Set3_76h_11_GFP-1.TIF	10	0.005	1.16794	2	5
		N2_Set3_56h_L4_08a_c2-1.TIF	45	0.002	0.467176	2	22.5			atg18_Set3_72h_L4_02a_c2-1.TIF	20	0.003	0.700764	3	6.66667			epg6_Set3_76h_14_GFP-1.TIF	5	0.003	0.700764	1	5
		N2_Set4_52h_L4_04a_c2-1.TIF	61	0.003	0.700764	3	20.3333			atg18_Set3_72h_L4_04a_c2-1.TIF	12	0.005	1.16794	2	6			epg-6_Set4_52h_L4_06a_c2-1.TIF	11	0.002	0.467176	2	5.5
		N2_Set4_52h_L4_07a_c2-1.TIF	48	0.003	0.700764	3	16			atg18_Set3_72h_L4_07a_c2-1.TIF	10	0.002	0.467176	1	10			Mean			0.778626		5.27778
		N2_Set4_52h_L4_08a_c2-1.TIF	76	0.003	0.700764	2	38			atg18_Set4_76h_L4_06a_c2-1.TIF	4	0.005	1.16794	2	2			STDEV			0.241249		2.07275
	Seam cells (epg)	N2_Set1_52h_13_GFP-1.TIF	70	0.003	0.700764	3	23.3333			Mean			0.817558		9.52083			p-value vs N2			0.320225		1.88104e-07
		N2_Set2_52h_01_c2-1.TIF	99	0.003	0.700764	3	33			STDEV			0.249716		4.55168
		N2_Set2_52h_08_GFP-1.TIF	44	0.002	0.467176	2	22			p-value vs N2			0.149724		1.46386e-05
		N2_Set4_52h_L4_06a_c2-1.TIF	41	0.002	0.467176	2	20.5
		Mean			0.661832		23.9861
		STDEV			0.167655		6.43438
	N2 (wild type)								atg-18(gk378)								epg-6(bp242)
		Slice	Count	AVG size (inch2)	Size (μm2)					Slice	Count	AVG size (inch2)	Size (μm2)					Slice	Count	AVG size (inch2)	Size (μm2)
	Head (atg)	N2_Set2_52h_L4_01c_c2-1.TIF	12	0.001	0.233588				Head	atg18_Set2_76h_L4_01c_c2-1.TIF	53	0.003	0.700764				Head	epg-6_Set4_52h_L4_02c_c2-1.TIF	51	0.003	0.700764
		N2_Set2_52h_L4_03c_c2-1.TIF	23	0.001	0.233588					atg18_Set2_76h_L4_03c_c2-1.TIF	47	0.003	0.700764					epg-6_Set4_52h_L4_04c_c2-1.TIF	37	0.003	0.700764
		N2_Set2_52h_L4_04c_c2-1.TIF	33	0.002	0.467176					atg18_Set2_76h_L4_04c_c2-1.TIF	54	0.003	0.700764					epg-6_Set4_52h_L4_06c_c2-1.TIF	64	0.003	0.700764
		N2_Set2_52h_L4_07c_c2-1.TIF	24	0.001	0.233588					atg18_Set2_76h_L4_06c_c2-1.TIF	58	0.003	0.700764					epg-6_Set4_76h_L4_03c_c2-1.TIF	54	0.002	0.467176
		N2_Set3_56h_L4_01c_c2-1.TIF	23	0.002	0.467176					atg18_Set2_76h_L4_09c_c2-1.TIF	40	0.002	0.467176					Mean	51.5		0.642367
		N2_Set3_56h_L4_03c_c2-1.TIF	16	0.002	0.467176					atg18_Set3_72h_L4_03c_c2-1.TIF	55	0.003	0.700764					STDEV	11.1505		0.116794
		N2_Set3_56h_L4_05c_c2-1.TIF	12	0.001	0.233588					atg18_Set3_72h_L4_07c_c2-1.TIF	38	0.002	0.467176					p-value vs N2	0.00681247		0.00552751
		N2_Set3_56h_L4_08c_c2-1.TIF	13	0.001	0.233588					atg18_Set4_76h_L4_06c_c2-1.TIF	36	0.003	0.700764
		N2_Set4_52h_L4_01c_c2-1.TIF	16	0.002	0.467176					atg18_Set4_76h_L4_04c_c2-1.TIF	47	0.003	0.700764
		N2_Set4_52h_L4_03c_c2-1.TIF	18	0.001	0.233588					atg18_Set4_76h_L4_02c_c2-1.TIF	68	0.003	0.700764
		N2_Set4_52h_L4_06c_c2-1.TIF	12	0.001	0.233588					atg18_Set4_76h_L4_01c_c2-1.TIF	73	0.003	0.700764
		N2_Set4_52h_L4_07c_c2-1.TIF	17	0.001	0.233588					atg18_Set4_76h_L4_07c_c2-1.TIF	50	0.003	0.700764
	Head (epg)	N2_Set4_52h_L4_03c_c2-1.TIF	17	0.001	0.233588					atg18_Set4_76h_L4_08c_c2-1.TIF	50	0.003	0.700764
		N2_Set4_52h_L4_04c_c2-1.TIF	13	0.002	0.467176					Mean	51.4615		0.664827
		N2_Set4_52h_L4_05c_c2-1.TIF	26	0.002	0.467176					STDEV	10.7905		0.0877201
		Mean	18.3333		0.327023					p-value vs N2	9.68797e-09		4.81873e-09
		STDEV	6.21825		0.118451
		Settings for the ImageJ stress granule counter plugin:			Parameters for the calculations for size in μm2 from inch2
		seam cells				AVG size in inch2/size of 1 pixel in inch2*size of 1 pixel in μm2			Surface area of 1 Pixel
		Number of smoothes	70		Size of 1 pixel in inch2	0.0067*0.0067		=	4.489e-05
		Number of smoothes after subtraction	4		Size of 1 pixel in μm2	0.1024*0.1024		=	0.0104858
		Threshold	3000
		Minimum particle size, pixels	25		Formula to calculate size in µm2:		(AVG size in inch2)/(size of 1 pixel in inch2)*(size of 1 pixel in μm2)
		Maximum particle size, pixels	10000
		Minimum particle circularity	0.2
		head
		Number of smoothes	70
		Number of smoothes after subtraction	4
		Threshold	3000
		Minimum particle size, pixels	25
		Maximum particle size, pixels	10000
		Minimum particle circularity	0.6

## Sheet: Data Figure 6
	Figure 6C atg18(gk378)
	Quantification GFP-LGG1							Quantification cleaved GFP
	Number	Vol, %	Volume	Height	Area	treatment	Normalization lgg-1/tubulin	Number	Vol, %	Volume	Height	Area	Normalization cleaved/tubulin	total gfp	percentage cleaved gfp	treatment	percentage cleaved gfp
	No 1	3.906	21610041	10.271	8.61	N2+NH4Cl	0.35817	No 1	7.764	1077834	715	10.48	0.0178643	0.376034	4.7507	N2+NH4Cl	4.7507
	No 2	2.118	11718269	7.193	6.79	N2	0.503716	No 2	0.694	96315	96	8.32	0.00414015	0.507856	0.815221	N2	0.815221
	No 3	19.517	107971699	47.437	7.28	atg-18+NH4Cl	1.36193	No 3	8.406	1166916	464	8.24	0.0147193	1.37665	1.06921	atg-18+NH4Cl	1.06921
	No 4	19.257	106532201	48.773	7.35	atg-18	1.10761	No 4	8.474	1176309	433	8.16	0.01223	1.11984	1.09212	atg-18	1.09212
	No 5	5.168	28590018	18.49	5.18	N2+NH4Cl	0.401182	No 5	27.441	3809234	2.99	6.48	0.053452	0.454634	11.7572	N2+NH4Cl	11.7572
	No 6	5.092	28168394	17.371	6.09	N2	0.559576	No 6	10.409	1444950	737	6.96	0.0287045	0.58828	4.87939	N2	4.87939
	No 7	24.152	133617901	50.599	6.86	atg-18+NH4Cl	3.86005	No 7	17.123	2377003	1.091	7.92	0.0686686	3.92872	1.74786	atg-18+NH4Cl	1.74786
	No 8	20.79	115018579	47.965	7.07	atg-18	4.25044	No 8	19.688	2733031	1.291	7.52	0.100997	4.35144	2.32101	atg-18	2.32101
	No 9	5.202	28780218	17.546	6.58	N2+NH4Cl	1.26296	No 9	21.723	3015462	1.418	8	0.132327	1.39529	9.48387	N2+NH4Cl	9.48387
	No 10	7.381	40833938	32.911	7.14	N2	1.12644	No 10	10.809	1500468	683	8.4	0.0413918	1.16783	3.54432	N2	3.54432
	No 11	24.149	133601515	50.569	7.07	atg-18+NH4Cl	8.30901	No 11	20.015	2778464	1.009	7.92	0.1728	8.48181	2.0373	atg-18+NH4Cl	2.0373
	No 12	23.96	132554620	50.016	10.43	atg-18	4.84071	No 12	17.354	2408963	1.012	12.64	0.087972	4.92868	1.7849	atg-18	1.7849
	Quantification Tubulin
	Number	Vol, %	Volume	Height	Area
	No 1	13.64	60334652	38.898	15.18
	No 2	5.259	23263643	20.105	11.77
	No 3	17.923	79278162	61.97	12.65
	No 4	21.744	96182116	64.734	13.53
	No 5	16.111	71264533	56.777	9.68
	No 6	11.38	50338823	37.453	11
	No 7	7.826	34615578	25.203	11.88
	No 8	6.118	27060400	18.97	12.21
	No 9	5.152	22787929	16.822	12.1
	No 10	8.195	36250376	23.16	13.09
	No 11	3.635	16079119	12.662	12.54
	No 12	6.191	27383288	13.414	17.05
	Figure 6C epg-6(bp242)
	Quantification GFP-LGG1							Quantification cleaved GFP
	﻿ Number	Vol. %	Volume	Height	Area	treatment	Normalization lgg-1/tubulin	﻿ Number	Vol. %	Volume	Height	Area	Normalization cleaved/tubulin	total gfp	percentage cleaved gfp	treatment	percentage cleaved gfp
	No 1	8610	38095244	18.449	9.348	N2+NH4Cl	0.951992	No 1	15457	4648382	2.329	7.616	0.116162	1.06815	10.875	N2+NH4Cl	10.875
	No 2	8754	38732856	20.107	7.954	N2	0.483609	No 2	9683	2912077	1.461	6.732	0.0363595	0.519968	6.99263	N2	6.99263
	No 3	35666	157798185	50.927	8.692	epg-6+NH4Cl	1.47636	No 3	27648	8314562	2.979	7.276	0.0777913	1.55416	5.00537	epg-6+NH4Cl	5.00537
	No 4	32381	143263606	50.773	8.61	epg-6	1.37494	No 4	24035	7228003	2.74	6.46	0.0693689	1.4443	4.80293	epg-6	4.80293
	No 5	8078	35739918	14.785	7.708	N2+NH4Cl	0.419915	No 5	16148	4856175	2.394	7.14	0.0570561	0.476971	11.9622	N2+NH4Cl	11.9622
	No 6	6511	28807663	12.931	6.97	N2	0.425057	No 6	7029	2113810	1.033	6.12	0.0311892	0.456246	6.83606	N2	6.83606
	No 7	25684	113635366	40.346	8.036	epg-6+NH4Cl	1.72729	No 7	14450	4345492	1.675	6.188	0.0660529	1.79335	3.68322	epg-6+NH4Cl	3.68322
	No 8	21097	93340565	38.109	8.118	epg-6	1.67856	No 8	11108	3340381	1.528	5.916	0.0600708	1.73863	3.45506	epg-6	3.45506
	No 9	5576	24668956	12.775	7.79	N2+NH4Cl	0.258147	No 9	16412	4935458	2.693	7.276	0.0516468	0.309794	16.6714	N2+NH4Cl	16.6714
	No 10	5512	24387668	13	7.216	N2	0.389594	No 10	5790	1741320	929	6.256	0.0278177	0.417412	6.66432	N2	6.66432
	No 11	23268	102947663	37.19	10.414	epg-6+NH4Cl	1.58597	No 11	13859	4167752	1.582	7.412	0.0642069	1.65018	3.8909	epg-6+NH4Cl	3.8909
	No 12	31712	140306405	46.012	13.038	epg-6	1.94891	No 12	12023	3615639	1.602	11.56	0.0502225	1.99913	2.51222	epg-6	2.51222
	Quantification Tubulin
	﻿ Number	Vol. %	Volume	Height	Area
	No 1	8267	40016368	44.082	10.586
	No 2	16545	80091275	54.833	8.927
	No 3	22080	106882977	63.789	9.322
	No 4	21525	104196580	63.419	8.927
	No 5	17583	85112330	41.411	8.927
	No 6	14001	67773681	30.419	8.058
	No 7	13591	65788102	34.047	8.295
	No 8	11487	55607417	44.803	8.374
	No 9	19741	95561679	57.452	9.085
	No 10	12931	62597633	38.892	8.374
	No 11	13409	64911317	34.726	10.191
	No 12	14872	71992385	36.257	14.141

## Sheet: Data Figure 7
	Figure 7C
	Recovery (%)		spotted on bacteria-free area				Recovery (%)		spotted on bacteria			Moving (%)		spotted on bacteria-free area				Moving (%)		spotted on bacteria
	wild type	Days	Not-recovered	Recovered			wild type	Days	Not-recovered	Recovered		wild type	Days	Not-moving	Moving			wild type	Days	Not-moving	Moving
		1 (+2)	3.63152	96.3685				1 (+2)	1.69842	98.3016			1	21.6697	78.3303				1	20.4969	79.5031
		2 (+2)	6.84595	93.154				2 (+2)	4.2957	95.7043			2	37.3682	62.6318				2	15.8087	84.1913
		3 (+2)	24.2013	75.7987				3 (+2)	15.264	84.736			3	18.8951	81.1049				3	19.6908	80.3092
	atg-18	Days	Not-recovered	Recovered			atg-18	Days	Not-recovered	Recovered
		1 (+2)	32.2942	67.7058				1 (+2)	40.4237	59.5763		atg-18	Days	Not-moving	Moving			atg-18	Days	Not-moving	Moving
		2 (+2)	86.983	13.017				2 (+2)	74.3933	25.6067			1	32.8543	67.1457				1	34.5454	65.4546
		3 (+2)	96.7881	3.21191				3 (+2)	82.1791	17.8209			2	47.0233	52.9767				2	47.2805	52.7195
													3	56.6443	43.3557				3	54.1687	45.8313
	epg-6	Days	Not-recovered	Recovered			epg-6	Days	Not-recovered	Recovered
		1 (+2)	52.6883	47.3117				1 (+2)	18.1987	81.8013		epg-6	Days	Not-moving	Moving			epg-6	Days	Not-moving	Moving
		2 (+2)	88.4389	11.5611				2 (+2)	22.2247	77.7753			1	43.9771	56.0229				1	31.2815	68.7185
		3 (+2)	96.9737	3.0263				3 (+2)	45.1483	54.8517			2	46.5838	53.4162				2	36.0931	63.9069
													3	45.8181	54.1819				3	43.3879	56.6121
	atg-18;epg-6	Days	Not-recovered	Recovered			atg-18;epg-6	Days	Not-recovered	Recovered										atg-18;epg-6
		1 (+2)	95.5	4.5				1 (+2)	80.3743	19.6257		atg-18;epg-6	Days	Not-moving	Moving			atg-18;epg-6	Days	Not-moving	Moving
		2 (+2)	100	0				2 (+2)	89.254	10.746			1	45.9836	54.0164				1	43.4239	56.5761
		3 (+2)	100	0				3 (+2)	98.2518	1.7482			2	77.8544	22.1456				2	71.9573	28.0427
													3	89.8083	10.1917				3	82.036	17.964
	Figure 7D
	Days of starvation	Strain	Number of L1 larvae investigated	Recovery
				N	%
	1	N2 (wild type)	43	42	97.6744
		epg-6(bp242)	70	63	90
		atg-18(gk378)	49	15	30.6122
		atg-18(gk378);epg-6(bp242)	49	4	8.16327
	2	N2 (wild type)	106	104	98.1132
		epg-6(bp242)	58	52	89.6552
		atg-18(gk378)	47	1	2.12766
		atg-18(gk378);epg-6(bp242)	44	0	0
	3	N2 (wild type)	85	81	95.2941
		epg-6(bp242)	81	68	83.9506
		atg-18(gk378)	48	0	0
		atg-18(gk378);epg-6(bp242)	50	0	0
	4	N2 (wild type)	87	86	98.8506
		epg-6(bp242)	90	78	86.6667
		atg-18(gk378)	47	0	0
		atg-18(gk378);epg-6(bp242)	67	0	0
	5	N2 (wild type)	52	52	100
		epg-6(bp242)	85	52	61.1765
		atg-18(gk378)	53	0	0
		atg-18(gk378);epg-6(bp242)	46	0	0
	6	N2 (wild type)	83	83	100
		epg-6(bp242)	66	30	45.4545
		atg-18(gk378)	78	0	0
		atg-18(gk378);epg-6(bp242)	38	0	0
	8	N2 (wild type)	59	53	89.8305
		epg-6(bp242)	37	18	48.6486
		atg-18(gk378)	67	0	0
		atg-18(gk378);epg-6(bp242)	19	0	0
	11	N2 (wild type)	77	62	80.5195
		epg-6(bp242)	64	27	42.1875
		atg-18(gk378)	-	-
		atg-18(gk378);epg-6(bp242)	-	-
	13	N2 (wild type)	73	38	52.0548
		epg-6(bp242)	74	28	37.8378
		atg-18(gk378)	-	-
		atg-18(gk378);epg-6(bp242)	-	-
	15	N2 (wild type)	81	45	55.5556
		epg-6(bp242)	73	13	17.8082
		atg-18(gk378)	-	-
		atg-18(gk378);epg-6(bp242)	-	-
	18	N2 (wild type)	51	28	54.902
		epg-6(bp242)	54	4	7.40741
		atg-18(gk378)	-	-
		atg-18(gk378);epg-6(bp242)	-	-
	20	N2 (wild type)	70	28	40
		epg-6(bp242)	56	1	1.78571
		atg-18(gk378)	-	-
		atg-18(gk378);epg-6(bp242)	-	-
	22	N2 (wild type)	89	13	14.6067
		epg-6(bp242)	74	0	0
		atg-18(gk378)	-	-
		atg-18(gk378);epg-6(bp242)	-	-
	25	N2 (wild type)	36	1	2.77778
		epg-6(bp242)	52	0	0
		atg-18(gk378)	-	-
		atg-18(gk378);epg-6(bp242)	-	-
	27	N2 (wild type)	40	0	0
		epg-6(bp242)	54	0	0
		atg-18(gk378)	-	-
		atg-18(gk378);epg-6(bp242)	-	-
	29	N2 (wild type)	84	0	0
		epg-6(bp242)	59	0	0
		atg-18(gk378)	-	-
		atg-18(gk378);epg-6(bp242)	-	-

## Sheet: Data Figure 8
	Figure 8B-C
	#days	N2 (wild type)			epg-6(bp242)			atg-18(gk378)			atg-18(gk378);epg-6(bp242)				Mean/Median Lifespan calculated using OASIS
		Dead	Censored	Survival (%)	Dead	Censored	Survival (%)	Dead	Censored	Survival (%)	Dead	Censored	Survival (%)		Strain	No. of subjects	Restricted mean			Age in days at % mortality
	0	0	0	100	0	0	100	0	0	100	0	0	100				Days	Std. error	95% C.I.	0.25	0.5	0.75	0.9	1	95% Median C.I.
	2	0	1	100	0	4	100	0	5	100	0	4	100		N2 (wild type)	100	18.85	0.59	17.68 ~ 20.01	14	19	22	26	28	19 ~ 19
	5	0	20	100	0	12	100	0	7	100	0	1	100		epg-6(bp242)	100	23.37	0.94	21.54 ~ 25.21	20	22	27	30	40	21 ~ 24
	7	0	1	100	0	6	100	0	10	100	0	4	100		atg-18(gk378	100	16.12	0.36	15.41 ~ 16.83	14	15	19	20	21	14 ~ 15
	9	1	1	98.7179	1	3	98.7179	1	3	98.7179	2	5	97.8022		atg-18(gk378);epg-6(bp242)	100	18.44	0.55	17.37 ~ 19.52	15	19	21	24	27	- ~ -
	12	9	11	87.0277	2	8	96.0499	9	8	86.7117	9	15	87.3234
	14	10	5	71.487	4	17	90.0468	17	9	60.8503	6	13	78.5911
	15	4	1	64.5127	1	4	87.9527	9	2	43.1841	7	4	65.1731		Log-Rank Test calculated using OASIS
	19	12	1	43.0084	5	5	76.3799	17	0	6.47762	14	0	34.759		Condition		Statistics
	20	3	0	37.3986	3	0	68.1964	2	0	2.15921	3	0	28.2417				Chi^2	P-value	Bonferroni P-value
	21	3	0	31.7889	5	0	54.5571	1	0	0	2	0	23.8968		N2 (wild type) v.s.	epg-6(bp242)	17.3	3.2e-05	0.0001
	22	6	0	20.5693	3	0	46.3735				3	0	17.3795			atg-18(gk378)	15.4	0.0001	0.0003
	23	2	0	16.8294	1	1	43.6457				3	0	10.8622			atg-18(gk378);epg-6(bp242)	0.38	0.539	1
	24	2	0	13.0895	1	0	40.736				1	0	8.68974		epg-6(bp242) v.s.	N2 (wild type)	17.3	3.2e-05	0.0001
	26	4	0	5.6098	5	0	26.1874				2	0	4.34487			atg-18(gk378)	55.5	0	0
	27	1	0	3.73986	1	0	23.2777				2	0	0			atg-18(gk378);epg-6(bp242)	21.07	4.4e-06	1.3e-05
	28	2	0	0	3	0	14.5486								atg-18(gk378) v.s.	N2 (wild type)	15.4	0.0001	0.0003
	29				0	0	14.5486									epg-6(bp242)	55.5	0	0
	30				2	0	8.72914									atg-18(gk378);epg-6(bp242)	13.44	0.0002	0.0007
	31				0	0	8.72914								atg-18(gk378);epg-6(bp242) v.s.	N2 (wild type)	0.38	0.539	1
	33				1	0	5.81942									epg-6(bp242)	21.07	4.4e-06	1.3e-05
	34				0	0	5.81942									atg-18(gk378)	13.44	0.0002	0.0007
	35				0	0	5.81942
	37				1	0	2.90971
	40				1	0	0
		Survival (%) and statistical analysis was performed using the Online Application for the Survival Analysis of Lifespan
	Figure 8E-F
	#days	N2 (wild type)			epg-6(bp242)			atg-18(gk378)							Mean/Median Lifespan calculated using OASIS
		Dead	Censored	Survival (%)	Dead	Censored	Survival (%)	Dead	Censored	Survival (%)					Strain	No. of subjects	Mean lifespan			Age in days at % mortality
	1	0	0	100	0	6	100	0	12	100							Days	Std. error	95% C.I.	25%	50%	75%	90%	100%	95% Median C.I.
	2	0	3	100	0	20	100	1	8	98.8636					WT	100	15.57	0.49	14.61-16.53	12	16	18	21	25	14 ~ 16
	3	2	3	97.9381	6	20	91.8919	2	19	96.3608					epg-6(bp242)	100	14.34	0.81	12.75-15.93	11	12	13	14	-	- ~ -
	4	0	4	97.9381	0	12	91.8919	1	15	94.6994					atg-18(gk378)	100	10.54	0.37	9.82-11.26	11	15	19	20	22	13 ~ 16
	5	0	6	97.9381	0	3	91.8919	1	4	92.4446
	6	0	2	97.9381	1	0	89.1073	0	3	92.4446					Log-Rank Test calculated using OASIS
	7	0	0	97.9381	0	2	89.1073	0	6	92.4446					Condition		Statistics
	8	4	1	93.0412	2	2	83.1668	4	1	79.2382							Chi^2	P-value	Bonferroni P-value
	9	3	1	89.3196	3	4	73.5706	15	0	27.5611					N2 (wild type) vs	atg-18(gk278)	47.15	0	0
	12	12	1	74.2233	1	2	69.6985	3	1	17.2257						epg-6(bp242)	2.18	0.1395	0.2789
	13	9	2	62.7059	1	0	65.3423	3	0	4.30643					atg-18(gk378) v.s.	N2	47.15	0	0
	14	4	0	57.3692	1	0	60.9862	1	0	0						epg-6(bp242)	14.98	0.0001	0.0002
	15	3	0	53.3667	3	0	47.9177								epg-6(bp242) v.s.	N2	2.18	0.1395	0.2789
	16	5	0	46.6959	3	0	34.8492									atg-18(gk278)	14.98	0.0001	0.0002
	17	8	0	36.0225	2	0	26.1369
	18	9	0	24.015	3	0	13.0685
	20	8	0	13.3417	1	0	8.71231
	21	5	0	6.67084	1	0	4.35616
	22	2	0	4.00251	1	0	0
	23	1	0	2.66834
	24	1	0	1.33417
	25	1	0	0
		Survival (%) and statistical analysis was performed using the Online Application for the Survival Analysis of Lifespan
